# Supplementary material for: Establishing a Multifaceted Comprehensive Maternity Cohort Facilitates Understanding of How Environmental Exposures Impact Perinatal Health
Source: PubMed Central journal article supplement — Environ Health (Wash). 2024 Jul 12;2(11):766–75. doi: 10.1021/envhealth.4c00104 (PMC11574626; doi:10.1021/envhealth.4c00104), 2024-07-12
Supplement: eh4c00104_si_001.pdf [file eh4c00104_si_001.pdf]

## SUPPLEMENTARY MATERIALS

### Establishing a Multifaceted Comprehensive Maternity Cohort Facilitates Understanding of How Environmental Exposures Impact Perinatal Health

#### *Cohort Profile: Zhejiang Environmental and Birth Health Research Alliance (ZEBRA) Maternity Cohort*

Haitong Zhe Sun <sup>1,2,3,4,5,6,†</sup>, Haiyang Tang <sup>1,†</sup>, Qingyi Xiang <sup>1</sup>, Siyuan Xu <sup>1</sup>, Yijia Tian <sup>1</sup>, Huan Zhao <sup>7,1</sup>, Jing Fang <sup>1,8</sup>, Haizhen Dai <sup>1</sup>, Rui Shi <sup>1</sup>, Yuxia Pan <sup>1</sup>, Ting Luo <sup>1,9</sup>, Hangbiao Jin <sup>10</sup>, Chenyang Ji <sup>11</sup>, Yuanchen Chen <sup>10</sup>, Hengyi Liu <sup>12</sup>, Meirong Zhao <sup>10</sup>, Kun Tang <sup>13</sup>, Sheena Nishanti Ramasamy <sup>3</sup>, Evelyn Xiu-Ling Loo <sup>3,14,15</sup>, Lynette P Shek <sup>2,3</sup>, Yuming Guo <sup>16</sup>, Wei Xu <sup>17</sup> and Xiaoxia Bai <sup>1,18</sup>

- <sup>1</sup> Department of Obstetrics, Women's Hospital, Zhejiang University School of Medicine, Hangzhou, Zhejiang 310006, PR China
- <sup>2</sup> Centre for Sustainable Medicine, Yong Loo Lin School of Medicine, National University of Singapore, Singapore 119228, Republic of Singapore
- <sup>3</sup> Department of Paediatrics, Yong Loo Lin School of Medicine, National University of Singapore, Singapore 117549, Republic of Singapore
- <sup>4</sup> Saw Swee Hock School of Public Health, National University of Singapore, Singapore 117549, Republic of Singapore
- <sup>5</sup> Yusuf Hamied Department of Chemistry, University of Cambridge, Cambridge CB2 1EW, UK
- <sup>6</sup> Department of Earth Sciences, University of Cambridge, Cambridge CB2 3EQ, UK
- <sup>7</sup> Department of Obstetrics and Gynecology, The Fourth Affiliated Hospital, Zhejiang University School of Medicine, Yiwu, Zhejiang 322000, PR China
- <sup>8</sup> Lanxi People's Hospital, Jinhua, Zhejiang 321102, PR China
- <sup>9</sup> Wenling Women's and Children's Hospital, Taizhou, Zhejiang 317500, PR China
- <sup>10</sup> Key Laboratory of Microbial Technology for Industrial Pollution Control of Zhejiang Province, College of Environment, Zhejiang University of Technology, Hangzhou, Zhejiang 310032, PR China
- <sup>11</sup> Key Laboratory of Pollution Exposure and Health Intervention of Zhejiang Province, Interdisciplinary Research Academy, Zhejiang Shuren University, Hangzhou, Zhejiang 310006, PR China
- <sup>12</sup> Institute of Reproductive and Child Health / National Health Commission Key Laboratory of Reproductive Health, School of Public Health, Peking University Health Science Centre, Beijing 100191, PR China
- <sup>13</sup> Vanke School of Public Health, Tsinghua University, Beijing 100084, PR China
- <sup>14</sup> Singapore Institute for Clinical Sciences (SICS), Agency for Science, Technology and Research (A\*STAR), 30 Medical Drive, Singapore 117609, Republic of Singapore
- <sup>15</sup> Human Potential Translational Research Programme, Yong Loo Lin School of Medicine, National University of Singapore, Singapore 117549, Republic of Singapore
- <sup>16</sup> School of Public Health and Preventive Medicine, Monash University, Melbourne, VIC 3004, Australia
- <sup>17</sup> Maternal and Child Health Division, Health Commission of Zhejiang Province, Hangzhou, Zhejiang 310006, PR China
- <sup>18</sup> Key Laboratory of Women's Reproductive Health, Hangzhou, Zhejiang 310006, PR China

†HZS and HT contributed equally.

\*Correspondence to [baixiaoxia@zju.edu.cn](mailto:baixiaoxia@zju.edu.cn) (Dr. Xiaoxia Bai).

## Supplementary Contents

### Content S1 | Detailed Reasons for Choosing Zhejiang Province as Pilot Site

Zhejiang Province, located in the Yangtze River Delta region on the east coast of China, spans 105,500 square kilometers (longitude 118°01'–123°10' E, latitude 27°02'–31°11' N). The province lies within the Humid Subtropical Climate Zone, characterized by significant monsoon alternation, moderate annual temperature, four distinct seasons, abundant sunshine, and rainfall. However, environmental problems, particularly air pollution, persist in Zhejiang Province. Despite effective reduction campaigns on several criteria air pollutants (i.e. PM<sub>10</sub>, sulfur dioxide, nitrogen dioxide, and carbon monoxide) in recent years,<sup>1</sup> the excess rates of PM<sub>2.5</sub> and ozone (O<sub>3</sub>) remain relatively high, at 6.8% and 4.9%, respectively, with peak O<sub>3</sub> concentrations reaching 60–80 ppb.<sup>2</sup> Such high O<sub>3</sub> pollution poses population health hazards<sup>3</sup> and warrants future environmental epidemiological studies in Zhejiang Province.

The selection of Zhejiang as a priority province for the pioneering study of the large maternity cohort is justified by several reasons. Firstly, clinical treatment and primary care must take precedence over data-driven empirical studies, in keeping with the principle of humanism. In cases of limited resources, hospitals, medical schools, and medical research institutes must prioritize the prevention of maternal and neonatal deaths. While China has achieved significant reductions in maternal mortality rates through years of medical staff efforts, significant heterogeneity persists in the geographical distribution of mortality rates. Regions with low maternal mortality rates are concentrated in the east and southeast of China. In Zhejiang, the maternal and infant mortality rates were controlled within 7/100,000 and 5‰, respectively, maintaining the lowest levels in China. However, in southwest China, such as Yunnan, the maternal mortality rate was four times higher than that in Zhejiang Province in 2012. Therefore, for areas with high maternal mortality, the focus of medicine is still on the care of pregnant women and newborns. When the mortality rate is reduced to the forefront level globally, research based on data will be carried out.

Secondly, Zhejiang's critical role in the economic development of China also justifies its selection. In 2020, Zhejiang's GDP reached 936.7 billion US dollars, accounting for 6.4% of the nation-level total GDP and ranking fourth among all provinces. Zhejiang's economy even surpassed that of the Netherlands (909.1 billion US dollars), which ranks 17<sup>th</sup> worldwide. This flourishing economy also promotes the popularization of digital medicine, which provides a solid foundation for epidemiological studies, such as the ZEBRA Maternity Cohort and the Zhejiang Birth Cohort (ZBC).

Thirdly, geographical coverage and population representativeness were considered in the selection process. Beijing, Shanghai, and Zhejiang are the provincial regions with the lowest maternal and infant mortality rates in China, with the first two regions being municipalities directly under the Central Government. Beijing and Shanghai have attracted individuals with the highest education and economic status in China, with territorial areas of 16,411 and 6,340 square kilometers, respectively, which is far less than that of Zhejiang Province (101,800 square kilometers). Hence, Zhejiang Province is the ideal location to carry out digital maternal health public health research based on the current situation in China. The ZEBRA study also promises to share clinical experience and research findings with other regions of the country and even the world through the China Cohort Consortium (CCC), with the radiation driving less-developed regions to achieve geographical health justice.

## Content S2 | Cohort Follow-up Design

The postpartum follow-up of the ZEBRA maternal cohort is an important aspect of the study, which continues until six months after delivery. The follow-up mainly includes the following procedures:

- (1) Within three days after delivery, the mothers undergo a set of fundamental physical examinations. These may include, but are not limited to, a blood routine test (which is decided independently by the obstetrician based on the condition of the pregnant woman), blood pressure measurement, and cardiac function evaluation. If the pregnant woman has pregnancy complications, targeted blood tests may be conducted.
- (2) We recommend that mothers undergo a hospital follow-up in the sixth week after delivery, which includes an assessment of weight recovery, blood pressure, and uterine involution. If the pregnant woman has pregnancy complications, targeted blood tests may be conducted.
- (3) We advise the mothers to report any abnormal health conditions within six months after delivery to the hospital by telephone. If the hospital has not received any such report, it will conduct a unified telephone follow-up in the sixth month, including an assessment of the mother's blood pressure, weight, and breastfeeding. If the mother is healthy, the cohort follow-up ends, and the participants exit the cohort. However, if the mother has abnormal conditions or shows any signs of abnormal health, we will add a case-by-case follow-up for further clinical observation according to the situation.

The follow-up of neonates in the ZEBRA maternal cohort is conducted until six months after birth, and it mainly includes:

- (1) Documentation of birth weight and Apgar score at birth.
- (2) Clinical observation of jaundice, respiration, and feeding status within three days of birth.
- (3) Evaluation of weight and height development at 42 days after birth and recording of other health abnormalities.
- (4) It is recommended that the mother report any abnormal health conditions of the neonate by telephone within six months after birth. If the hospital where the mother gave birth has not received any report, a unified telephone follow-up will be conducted in the sixth month to gather information.

## Content S3 | Questionnaire-based Lifestyle and Behavioral Pattern Collection

In the upcoming stage of data collection for ZEBRA Maternity Cohort participants, we will focus on including but not limited to the following list of lifestyle and behavioral characteristics:

**Dietary habits**, primarily referring to the intake quantity and frequency of different types of foods, including vegetables, fruits, nuts, poultry, red meat, seafood, vitamins and nutritional supplements, dairy products, coffee, as well as sugar and salt.

**Smoking habits**, including active and second-hand smoking, and currently under exposure, or with exposure history.

**Sleep patterns**, including bedtime, wake-up time, self-rated sleep quality, and habits of napping or siesta.

**Screen exposure**, including the frequency of screen exposure, types of screens exposed to (smartphones, tablets, desktop computers, laptops, etc.), and the purposes of screen exposure (work, study, entertainment, etc.).

**Pre-pregnancy physical activity**, mainly referring to the intensity and frequency of different types of exercises, including running, racket sports (e.g. tennis, table-tennis, badminton), cycling, swimming, dancing, extreme sports (e.g. rock climbing, scuba diving), etc.

**Therapies**, mainly including the frequency of massage therapy and psychological counseling.

**Artistic activities**, mainly including the intensity and frequency of painting, calligraphing, playing musical instrument, singing, dancing, etc.

**Mental conditions**, including mild to moderate levels of anxiety and depression (considering the privacy protection of the cohort participants, severe mental disorders, such as bipolar disorder, are not included in the items to be collected by self-report).

**Behavioral changes for climate adaptation**, referring to behavioral adjustments to extreme heat, extreme cold weather, and high outdoor air pollution. This primarily includes the use of air conditioners, central heating system, and air purifiers, as well as changes in means of transportation.

## Content S4 | Overview of Published Studies Based on ZEBRA Maternity Cohort

Previous research conducted by ZEBRA primarily involves microscale laboratory experiments, as well as data-driven macroscale population-based epidemiological studies. For the purposes of this summary, we have selected publications that are of significant clinical or public health importance.

### Uterine rupture risk factor identification

We identified 19 cases of uterine rupture among pregnant women who had not previously undergone caesarean section between 1992 and 2017. We collected demographic and sociological characteristics, clinical features, and details on the location and extent of the rupture (i.e. complete or incomplete), as well as pregnancy complications and childbirth risk factors (e.g. prolonged labor, dystocia, induced labor, use of oxytocin, etc.). We found that a history of curettage and multiple pregnancy were associated with complete uterine rupture, which was more likely to occur in the fundus of the uterus and at a smaller gestational age, leading to adverse pregnancy outcomes. Compared to neonates with complete uterine rupture, those with incomplete uterine rupture exhibited higher Apgar scores and lower perinatal mortality.<sup>4</sup> While findings from these rare cases may be used for clinical guidance, the limited sample size restricts generalization, highlighting the need for more cases from the ZEBRA maternity cohort in the future to support these findings.

### Neonatal organic pollutant exposure

Currently, research into the pregnancy exposure characteristics and transplacental metastasis of isoforms of per- and polyfluoroalkyl compounds (PFASs) is limited. Such evidence not only advances our comprehension of the mechanism of transplacental transfer of PFASs, but also provides guidance for controlling the production process associated with particular PFASs to lessen occupational and daily exposure. To enhance our understanding of the transplacental and breastfeeding transfer of PFASs, and provide data that supports neonatal health risk assessment, we gathered mother-child paired maternal serum, cord serum, breast milk, or placenta samples from three Chinese cities—Hangzhou, Wuhan, and Mianyang—to capture geographical variability for the determination of various PFAS species' concentrations. The mean concentration of  $\Sigma$ PFAS in maternal serum followed the order of Mianyang (4.44 ng/mL) < Wuhan (9.88 ng/mL) < Hangzhou (19.72 ng/mL).<sup>5</sup> Perfluorooctanoic acid (PFOA), perfluorooctanesulfonic acid (PFOS), and 6:2 chlorinated polyfluorinated ether sulfonates (6:2 Cl-PFESA) were the most prevalent PFASs found in serum.<sup>6,7</sup> Linear and branched PFOS and PFOA can be effectively transferred across the placenta, with exposure levels ranked in the order of maternal serum > cord serum > placenta.<sup>8,9</sup> Moreover, we have critically summarized the current knowledge on the inner exposure status and mother-to-infant transfer characteristics of PFASs, drawing on hundreds of studies published from 2000 to date, in order to better comprehend this field.<sup>10,11</sup>

In addition, we collected paired serum and cerebrospinal fluid samples from 49 and 22 neonates, respectively, to determine the concentrations of PFASs in these biological samples. Our findings showed positive concentrations of PFASs in the cerebrospinal fluid, leading us to conclude that both PFASs and emerging PFAS substitutes have the ability to penetrate the developing blood-cerebrospinal fluid barrier (BCSFB), thus posing a potential risk to the healthy development of newborns.<sup>12</sup>

### Mother-to-child intergenerational transmission

In order to investigate the potential transmission of Hepatitis B Virus (HBV) from mother to infant, we obtained placental tissues from three groups of women: 30 healthy pregnant women who were not infected with HBV (HBV<sup>-/-</sup>), 30 HBV-positive women who did not infect their neonates (HBV<sup>+/-</sup>), and 30 HBV-positive women who did infect their neonates (HBV<sup>+/+</sup>). Additionally, peripheral blood samples were collected from the femoral vein of six HBV<sup>+/+</sup> and six HBV<sup>+/-</sup> neonates. Serum protein expression profiles of HBV were analyzed by proteomics, and the expression of proteins related to intrauterine HBV transmission was further confirmed through immunohistochemistry and PCR techniques in both serum samples and placental tissues. After screening and identifying 35 differential proteins, we found that high expression levels of S100-family proteins and exocytosis mediated by the AnxA2-S100A10 complex were associated with intrauterine HBV transmission through the placenta.<sup>13,14</sup>

The intergenerational effects of maternal antibiotic abuse on mother-child health have been a subject of concern among public health researchers, given the evidence of potential hazards to the healthy growth and development of children. Notably, the damage to gut bacteria is a significant outcome of antibiotic exposure.<sup>15</sup> In light of this, we collected breast milk and fecal samples from 25 mothers in 2020, among which 9 received no antibiotic treatment, 13 received cefuroxime (CXM) treatment, and 3 received cefuroxime-cefoxitin (CXM-CFX) combined treatment. At a 6-month postpartum follow-up, we collected fecal samples

from five infants whose mothers had undergone antibiotic treatments. We analyzed the microbiota in both breast milk and fecal samples to investigate the undesirable effects of antibiotics on the microbiota. Furthermore, we compared the relative abundance of antibiotic resistance genes (ARGs) in the infant gut microbiota to investigate their transfer. While antibiotic treatments had no influence on the microbiota of breast milk, they did disturb the gut microbiota in neonates. The abundance of ARGs in the infant gut microbiota showed a declining trend in the antibiotic-treated groups but significantly increased after 6 months of recovery.<sup>16</sup>

### **Gestational effects from severe diseases**

Gestational trophoblastic neoplasia (GTN) is a specific tumor that affects pregnant women, originating from the malignant transformation of trophoblastic cells in placental villi during pregnancy. Chemotherapy has been recognized as an effective method to treat GTN, although concerns have been raised regarding its potential impact on pregnancy outcomes. In order to investigate this potential effect, we recruited 319 pregnant patients diagnosed with low-risk GTN in 2018 from the ZEBRA cohort. The patients were divided into two groups according to the occurrence of severe myelosuppression. We found that the occurrence of severe myelosuppression did not have an impact on the chemotherapy effect of methotrexate or the pregnancy outcomes.<sup>17</sup>

Gestational diabetes mellitus (GDM) is a crucial issue that has an impact on pregnancy outcomes and the long-term health of pregnant women. To investigate the feasibility of an early clinical diagnosis of GDM, we recruited all pregnant women diagnosed with GDM from the ZEBRA maternity cohort in 2019 and randomly selected healthy pregnant women with normal glucose tolerance as the control group. We used qRT-PCR to detect the expression level of the gene miR-520h in serum samples and analyzed the association between fasting blood glucose (FBG) level and miR-520h expression. Our results revealed that the expression level of miR-520h was up-regulated in the serum of GDM patients. We concluded that miR-520h could serve as a potential biomarker for the earlier-stage diagnosis of GDM.<sup>18</sup>

ZEBRA has directed attention towards understanding the pathological progression of endometrial carcinoma (EC). To this end, we obtained endometrial samples from 345 ZEBRA participants between 2006 and 2013, consisting of 55 normal endometrium (NE), 27 atypical hyperplasia (AH), and 263 Type-I EC. Immunohistochemical staining was performed to investigate the correlation between the expression of the TWIST1 chromosome and survival, as well as clinicopathological characteristics. Our findings indicate that TWIST1 expression gradually increased from NE to AH, implying that heightened TWIST1 expression is a significant indicator of the progression from hyperplasia to AH and eventually malignant tumor. Furthermore, we observed that high TWIST1 expression in Type-I EC patients suggested an increased invasive ability and a greater risk of distant metastasis of the tumor.<sup>19</sup>

## Supplementary Tables

**Table S1. Provincial distribution of ZEBRA Maternity Cohort participants.**

Provinces with no participants are not displayed in the table.

| Province               | Participants | Province               | Participants |
|------------------------|--------------|------------------------|--------------|
| <b>North China</b>     |              | <b>Central China</b>   |              |
| Beijing                | 169          | Henan                  | 1,216        |
| Tianjin                | 32           | Hubei                  | 228          |
| Hebei                  | 47           | Hunan                  | 472          |
| Shanxi                 | 36           | Guangdong              | 132          |
| Inner Mongolia         | 18           | Guangxi                | 45           |
|                        |              | Hainan                 | 20           |
| <b>Northeast China</b> |              | <b>Southwest China</b> |              |
| Liaoning               | 12           | Chongqing              | 67           |
| Jilin                  | 8            | Sichuan                | 55           |
| Heilongjiang           | 2            | Guizhou                | 9            |
|                        |              | Yunnan                 | 46           |
| <b>East China</b>      |              | <b>Northwest China</b> |              |
| Shanghai               | 1,179        | Shaanxi                | 12           |
| Jiangsu                | 2,026        | Gansu                  | 2            |
| Zhejiang               | 100,648      | Ningxia                | 1            |
| Anhui                  | 6,502        |                        |              |
| Fujian                 | 725          |                        |              |
| Jiangxi                | 4,299        |                        |              |
| Shandong               | 681          |                        |              |

**Table S2.** Full list of cases and prevalence of pre-pregnancy diseases and histories of surgeries.

Items are listed in descending sequence of prevalence.

| Disease history                                  | Cases<br>(Prevalence, %) | Disease history                                        | Cases<br>(Prevalence, %) |
|--------------------------------------------------|--------------------------|--------------------------------------------------------|--------------------------|
| Anemia                                           | 20,084 (16.9%)           | Thalassemia                                            | 416 (0.4%)               |
| Assisted reproduction                            | 8,194 (6.9%)             | Hyperthyroidism                                        | 403 (0.3%)               |
| Uterine leiomyomas                               | 7,393 (6.2%)             | Polycystic ovary syndrome                              | 403 (0.3%)               |
| Carrier of hepatitis B virus                     | 6,645 (5.6%)             | History of thyroid surgery                             | 403 (0.3%)               |
| History of hepatitis B infection                 | 5,129 (4.3%)             | Total thyroidectomy associate                          | 355 (0.3%)               |
| Mesosalpinx cyst                                 | 2,975 (2.5%)             | History of gallbladder disease                         | 355 (0.3%)               |
| Streptococcus carrier                            | 2,813 (2.4%)             | Congenital uterine malformation                        | 351 (0.3%)               |
| Thrombophilia                                    | 2,139 (1.8%)             | History of intrahepatic cholestasis of pregnancy (ICP) | 313 (0.3%)               |
| Ovarian cyst                                     | 2,107 (1.8%)             | Cervical conization and LEEP                           | 303 (0.3%)               |
| Liver abnormality                                | 2,070 (1.7%)             | Nephropathy and nephritis                              | 291 (0.2%)               |
| Immune system diseases                           | 1,950 (1.6%)             | History of hypertension                                | 277 (0.2%)               |
| Cervical incompetence                            | 1,413 (1.2%)             | Subtotal thyroidectomy                                 | 250 (0.2%)               |
| Hematopathy                                      | 1,142 (1.0%)             | Non-gestational diabetes mellitus                      | 242 (0.2%)               |
| Hashimoto thyroiditis                            | 1,049 (0.9%)             | Cardiac insufficiency                                  | 233 (0.2%)               |
| Placenta implantation (accreta/increta/percreta) | 1,023 (0.9%)             | History of Hashimoto's thyroiditis                     | 228 (0.2%)               |
| Antiphospholipid syndrome                        | 974 (0.8%)               | Amniotic fluid pollution                               | 201 (0.2%)               |
| History of cervical surgery                      | 968 (0.8%)               | History of Preeclampsia                                | 182 (0.2%)               |
| Mycoplasma infection                             | 933 (0.8%)               | Depression                                             | 180 (0.2%)               |
| Cholecystolithiasis and cholecystitis            | 881 (0.7%)               | Congenital heart disease                               | 174 (0.1%)               |
| Endometriosis                                    | 790 (0.7%)               | Bacterial vaginitis                                    | 165 (0.1%)               |
| History of malignant neoplasm of thyroid gland   | 692 (0.6%)               | Urolithiasis                                           | 159 (0.1%)               |
| Thrombocytopenia                                 | 690 (0.6%)               | Didelphic uterus                                       | 159 (0.1%)               |
| Candida vaginitis                                | 680 (0.6%)               | Ankylosing spondylitis                                 | 157 (0.1%)               |
| Septate uterus                                   | 648 (0.5%)               | Intrauterine death                                     | 141 (0.1%)               |
| Membranitis                                      | 622 (0.5%)               | Hellp's syndrome                                       | 140 (0.1%)               |
| Vaginitis                                        | 589 (0.5%)               | Antiphospholipid syndrome                              | 125 (0.1%)               |
| Cardiac arrhythmia                               | 538 (0.5%)               | Total thyroidectomy                                    | 105 (0.1%)               |
| History of hypothyroidism                        | 510 (0.4%)               | Epilepsy                                               | 92 (0.1%)                |
| Abnormal umbilical arterial flow                 | 484 (0.4%)               | Mental or behavioral disorders                         | 87 (0.1%)                |
| Single umbilical cord artery                     | 468 (0.4%)               | Hepatitis E                                            | 83 (0.1%)                |
| Pelvic inflammation                              | 466 (0.4%)               | Fatty liver                                            | 72 (0.1%)                |
| Uterine rupture                                  | 459 (0.4%)               | Systemic lupus erythematosus                           | 69 (0.1%)                |
| History of syphilis                              | 434 (0.4%)               | Thyroid nodule                                         | 64 (0.1%)                |
| Cervical polyps                                  | 428 (0.4%)               | Hepatic hemangiomas                                    | 58 (0.05%)               |
| Adenomyosis                                      | 428 (0.4%)               | Pulmonary arterial hypertension                        | 35 (0.03%)               |

**Table S3. Full list of statistics on obstetric-relevant diagnostic indicators.**

| Obstetric-relevant indicators                              | Mean (SD) or Count (%) | Obstetric-relevant indicators             | Mean (SD) or Count (%) |
|------------------------------------------------------------|------------------------|-------------------------------------------|------------------------|
| Gravidity                                                  | 2.1 (1.2)              | Neonatal sex, singleton                   |                        |
| Parity                                                     | 1.5 (0.6)              | Male                                      | 61,322 (51.7%)         |
| Abortion(s) or miscarriage(s)                              |                        | Female                                    | 57,289 (48.3%)         |
| 0                                                          | 69,065 (58.2%)         | First-degree obstetric lacerations        | 30,493 (25.7%)         |
| 1 to 2                                                     | 44,282 (37.3%)         | Second-degree obstetric lacerations       | 131 (0.1%)             |
| 3 to 5                                                     | 5,173 (4.4%)           | Third-degree obstetric lacerations        | 86 (0.1%)              |
| above 5                                                    | 169 (0.1%)             | Intrauterine fetal distress               | 27,057 (22.8%)         |
| Live birth(s)                                              |                        | Premature rupture of membranes            | 25,160 (21.2%)         |
| 0                                                          | 66,803 (56.3%)         | Caesarean scar                            | 24,587 (20.7%)         |
| 1                                                          | 48,994 (41.3%)         | Postpartum anemia                         | 21,787 (18.4%)         |
| 2                                                          | 2,707 (2.3%)           | Precipitate labor                         | 8,962 (7.6%)           |
| 3 or above                                                 | 186 (0.2%)             | Battledore placenta                       | 8,921 (7.5%)           |
| Spontaneous singleton delivery                             | 62,818 (52.9%)         | Oligohydramnios                           | 8,559 (7.2%)           |
| Caesarean singleton delivery                               | 51,506 (43.4%)         | Macrosomia                                | 7,712 (6.5%)           |
| Stillbirth                                                 | 1,605 (1.4%)           | Breech presentation                       | 7,133 (6.0%)           |
| Gestational age ( <i>in days</i> )                         | 271 (18)               | Postpartum hemorrhage                     | 6,163 (5.2%)           |
| Preterm birth                                              | 12,386 (10.4%)         | Intrauterine infection during pregnancy   | 5,337 (4.5%)           |
| Singleton preterm birth                                    | 11,385 (9.6%)          | Meconium-stained amniotic fluid           | 4,744 (4.0%)           |
| Twins or multiples                                         | 4,926 (4.2%)           | Intrahepatic cholestasis of pregnancy     | 4,188 (3.5%)           |
| Spontaneous preterm birth                                  | 6,738 (5.7%)           | Adherent placentas at delivery            | 3,719 (3.1%)           |
| Singleton spontaneous preterm birth                        | 5,332 (4.5%)           | Placenta previa                           | 3,121 (2.6%)           |
| Singleton medical-indicated preterm birth                  | 6,053 (5.1%)           | Placental abruption                       | 2,988 (2.5%)           |
| Menarche age (years)                                       | 13.9 (1.4)             | Fetal growth restriction                  | 2,447 (2.1%)           |
| Gestational weight gain (kg)                               | 13.5 (6.0)             | Polyhydramnios                            | 2,212 (1.9%)           |
| Gestational diabetes mellitus                              | 22,393 (18.9%)         | Fetal malformation                        | 1,431 (1.2%)           |
| Gestational hypertension                                   | 2,465 (2.1%)           | Vaginal birth after caesarean             | 984 (0.8%)             |
| Pre-eclampsia                                              | 6,553 (5.5%)           | Hypothyroidism in pregnancy               | 401 (0.3%)             |
| Severe pre-eclampsia                                       | 4,342 (3.7%)           | Fetal chromosome abnormalities            | 316 (0.3%)             |
| Single-symptom intrahepatic cholestasis of pregnancy (ICP) | 2,872 (2.4%)           | Twin pregnancies with single fetal demise | 266 (0.2%)             |
| Multi-symptomatic ICP                                      | 724 (0.6%)             | Multifetal pregnancy reduction            | 253 (0.2%)             |
| Birth weight, singleton (g)                                | 3,195 (580)            | Threatened uterine rupture                | 243 (0.2%)             |
| Low birth weight infants, singleton                        | 8,365 (7.0%)           | Fetal arrhythmia                          | 230 (0.2%)             |
| Apgar score, singleton, 1 min                              | 9.7 (1.3)              |                                           |                        |
| Apgar score, singleton, 5 min                              | 9.9 (0.5)              |                                           |                        |

**Table S4.** Full list of biochemical indices at parturient period and oral glucose tolerance test (OGTT) in second trimester, 24–28<sup>th</sup> gestational week.

Sample size: parturient period, N=118,689; second trimester, N=63,887.

| Biochemical indices                          | Ref. range  | Parturient period | Second trimester |
|----------------------------------------------|-------------|-------------------|------------------|
| Fasting plasma glucose (mmol/L)              | ≤5.1        | -                 | 4.9 (1.2)        |
| OGTT 1-h plasma glucose (mmol/L)             | ≤10         | -                 | 7.5 (2.1)        |
| OGTT 2-h plasma glucose (mmol/L)             | ≤8.5        | -                 | 7.3 (1.6)        |
| White blood cell count (×10 <sup>9</sup> /L) | 3.5–9.5     | 10.7 (3.4)        | 9.6 (2.2)        |
| Hemoglobin (g/L)                             | 115–150     | 115.1 (13.8)      | 114.7 (8.9)      |
| Platelet (×10 <sup>9</sup> /L)               | 125–350     | 187.0 (49.1)      | 209.9 (49.2)     |
| Neutrophils (%)                              | 40.0–75.0   | 77.4 (6.9)        | 74.9 (4.8)       |
| Lymphocytes (%)                              | 20.0–50.0   | 15.4 (5.9)        | 17.9 (4.2)       |
| Monocytes (%)                                | 3.0–10.0    | 6.5 (1.7)         | 6.0 (1.3)        |
| Eosinophils (%)                              | 0.4–8.0     | 0.6 (0.6)         | 1.0 (0.9)        |
| Basophils (%)                                | ≤1.0        | 0.2 (0.1)         | 0.3 (0.2)        |
| Hematocrits (%)                              | 35.0–45.0   | 34.6 (34.7)       | 34.3 (2.5)       |
| Serum protein, total (g/L)                   | 65–85       | 59.3 (6.1)        | 64.1 (3.6)       |
| Albumin (g/L)                                | 40–55       | 33.1 (3.4)        | 36.4 (2.2)       |
| Alanine aminotransferase (U/L)               | 7–40        | 15.2 (24.7)       | 17.7 (17.4)      |
| Aspartate aminotransferase (U/L)             | 13–35       | 21.7 (18.3)       | 18.7 (11.1)      |
| Bilirubin, total (μmol/L)                    | ≤23.0       | 8.3 (4.0)         | 6.9 (2.7)        |
| Bilirubin, conjugated (μmol/L)               | ≤4.0        | 2.6 (1.6)         | 2.2 (1.0)        |
| Bilirubin, unconjugated (μmol/L)             | ≤19.0       | 5.8 (3.0)         | 4.7 (2.1)        |
| Bile acids, total (μmol/L)                   | 0–13        | 4.5 (6.7)         | 2.3 (3.0)        |
| Lactate dehydrogenase (U/L)                  | 120–250     | 208.6 (66.7)      | 157.8 (29.9)     |
| Alkaline phosphatase (U/L)                   | 35–100      | 155.6 (65.1)      | 62.9 (20.0)      |
| 5'-Nucleotidase (U/L)                        | ≤10         | 4.9 (17.1)        | 4.8 (2.0)        |
| Adenosine deaminase (U/L)                    | ≤20         | 6.6 (1.8)         | 5.9 (1.2)        |
| Gamma-glutamyl transpeptidase (U/L)          | 120–250     | 12.6 (11.9)       | 12.2 (8.6)       |
| α-hydroxybutyrate dehydrogenase (U/L)        | 90–180      | 153.2 (38.2)      | 117.6 (26.9)     |
| Creatine Kinase (U/L)                        | 40–200      | 124.8 (167.1)     | 38.4 (21.2)      |
| Creatinine (μmol/L)                          | 41–73       | 52.6 (11.4)       | 51.5 (10.6)      |
| Urea nitrogen (mmol/L)                       | 2.6–7.5     | 3.1 (1.0)         | 2.8 (0.7)        |
| Uric acid (μmol/L)                           | 155–357     | 315.1 (76.2)      | 237.4 (49.3)     |
| Triglycerides (mmol/L)                       | 0.56–1.70   | 3.20 (1.60)       | 2.40 (0.90)      |
| Cholesterol, total (mmol/L)                  | 2.84–5.69   | 6.10 (1.30)       | 6.10 (1.10)      |
| HDL-cholesterol (mmol/L)                     | 1.03–1.55   | 1.70 (0.40)       | 1.90 (0.40)      |
| LDL-cholesterol (mmol/L)                     | 1.55–3.36   | 3.20 (1.00)       | 3.10 (0.90)      |
| Potassium (mmol/L)                           | 3.5–5.3     | 3.9 (0.3)         | 4.0 (0.3)        |
| Sodium (mmol/L)                              | 137.0–147.0 | 137.4 (2.2)       | 137.7 (1.8)      |
| Chlorine (mmol/L)                            | 99.0–110.0  | 105.1 (2.1)       | 103.8 (2.1)      |
| Calcium, total (mmol/L)                      | 2.11–2.52   | 2.20 (0.10)       | 2.20 (0.10)      |
| Magnesium (mmol/L)                           | 0.75–1.02   | 0.80 (0.10)       | 0.80 (0.20)      |
| Phosphate (mmol/L)                           | 0.85–1.51   | 1.20 (0.20)       | 1.20 (0.20)      |
| Total iron binding capacity (μmol/L)         | 7.8–32.2    | 14.7 (8.3)        | 17.3 (10.7)      |
| Hypersensitive C-reactive protein (mg/L)     | ≤5.0        | 17.7 (24.7)       | 5.2 (6.5)        |
| Prealbumin (g/L)                             | 180–350     | 203.4 (40.9)      | 221.6 (30.2)     |
| Transferrin (μmol/L)                         | 2.00–3.60   | 3.6 (0.7)         | 3.6 (0.7)        |
| Glycosylated albumin (%)                     | 10.8–17.1   | 11.6 (1.3)        | 12.1 (0.9)       |
| Homocysteine (μmol/L)                        | 5–15        | 7.9 (2.4)         | 6.8 (2.1)        |
| Plasma glucose (mmol/L)                      | ≤5.1        | 0.3 (1.5)         | 1.5 (2.9)        |
| Cholyglycine (μg/dL)                         | ≤270        | 232.5 (270.3)     | 148.2 (134.5)    |
| Prothrombin time (sec)                       | 11.8–13.9   | 12.6 (0.7)        | 12.6 (0.5)       |
| International normalized ratio               | 0.89–1.90   | 0.98 (0.07)       | 0.98 (0.05)      |
| Partial thromboplastin time, activated (sec) | 29.7–41.8   | 33.2 (3.0)        | 31.8 (2.3)       |
| Thrombin time (sec)                          | 15.0–18.0   | 15.1 (1.0)        | 14.9 (0.7)       |
| Fibrinogen (g/L)                             | 1.90–3.80   | 4.6 (0.8)         | 4.3 (0.7)        |
| Urine specific gravity                       | 1.003–1.030 | 1.014 (0.007)     | 1.014 (0.007)    |
| <b>Proteinuria</b>                           |             |                   |                  |
| - (Negative)                                 | -           | 113,724 (95.8%)   | 63,600 (99.6%)   |
| +                                            | -           | 3,328 (2.8%)      | 206 (0.3%)       |
| ++                                           | -           | 1,226 (1.0%)      | 51 (0.1%)        |
| +++                                          | -           | 411 (0.3%)        | 30 (0.05%)       |

| Biochemical indices                 | Ref. range | Parturient period | Second trimester |
|-------------------------------------|------------|-------------------|------------------|
| <b>Microscopic hematuria</b>        |            |                   |                  |
| -                                   | -          | 60,404 (50.9%)    | 60,577 (94.8%)   |
| +                                   | -          | 6,865 (5.8%)      | 1,966 (3.1%)     |
| ++                                  | -          | 9,143 (7.7%)      | 799 (1.3%)       |
| +++                                 | -          | 42,278 (35.6%)    | 545 (0.9%)       |
| <b>Glycosuria</b>                   |            |                   |                  |
| -                                   | -          | 111,848 (94.2%)   | 60,397 (94.5%)   |
| +                                   | -          | 2,545 (2.1%)      | 1,267 (2.0%)     |
| ++                                  | -          | 2,810 (2.4%)      | 1,362 (2.1%)     |
| +++                                 | -          | 1,365 (1.1%)      | 828 (1.3%)       |
| ++++                                | -          | 122 (0.1%)        | 21 (0.1%)        |
| <b>Urine bilirubin</b>              |            |                   |                  |
| -                                   | -          | 117,884 (99.3%)   | 63,747 (99.8%)   |
| +                                   | -          | 707 (0.6%)        | 106 (0.2%)       |
| ++                                  | -          | 63 (0.1%)         | 26 (0.04%)       |
| +++                                 | -          | 34 (0.03%)        | 6 (0.01%)        |
| <b>Urine leucocyte</b>              |            |                   |                  |
| -                                   | -          | 85,636 (72.2%)    | 39,018 (61.1%)   |
| +                                   | -          | 11,060 (9.3%)     | 11,769 (18.4%)   |
| ++                                  | -          | 8,947 (7.5%)      | 5,392 (8.4%)     |
| +++                                 | -          | 13,047 (11.0%)    | 7,708 (12.1%)    |
| <b>Protein excretion, 24-hr (g)</b> | <0.15      | 1.10 (2.30)       | 0.10 (0.10)      |

## REFERENCES

1. Ma X, Huang J, Zhao T, et al. Rapid increase in summer surface ozone over the North China Plain during 2013–2019: a side effect of particulate matter reduction control? *Atmos Chem Phys* 2021; **21**(1): 1-16.
2. Sun H, Shin YM, Xia M, et al. Spatial Resolved Surface Ozone with Urban and Rural Differentiation during 1990-2019: A Space-Time Bayesian Neural Network Downscaler. *Environ Sci Technol* 2022; **56**(11): 7337-49.
3. Sun HZ, Yu P, Lan C, et al. Cohort-based long-term ozone exposure-associated mortality risks with adjusted metrics: A systematic review and meta-analysis. *The Innovation* 2022; **3**(3): 100246.
4. Zhao P, Su C, Wang C, Xu J, Bai X. Clinical characteristics of uterine rupture without previous Cesarean section: A 25-year retrospective study. *J Obstet Gynaecol Res* 2021; **47**(6): 2093-8.
5. Liu Y, Liu K, Zheng P, et al. Prenatal exposure and transplacental transfer of perfluoroalkyl substance isomers in participants from the upper and lower reaches of the Yangtze River. *Environ Pollut* 2021; **270**: 116202.
6. Xu C, Yin S, Liu Y, et al. Prenatal exposure to chlorinated polyfluoroalkyl ether sulfonic acids and perfluoroalkyl acids: Potential role of maternal determinants and associations with birth outcomes. *J Hazard Mater* 2019; **380**: 120867.
7. Zheng P, Liu Y, An Q, et al. Prenatal and postnatal exposure to emerging and legacy per-/polyfluoroalkyl substances: Levels and transfer in maternal serum, cord serum, and breast milk. *Sci Total Environ* 2022; **812**: 152446.
8. Chen F, Yin S, Kelly BC, Liu W. Chlorinated Polyfluoroalkyl Ether Sulfonic Acids in Matched Maternal, Cord, and Placenta Samples: A Study of Transplacental Transfer. *Environ Sci Technol* 2017; **51**(11): 6387-94.
9. Chen F, Yin S, Kelly BC, Liu W. Isomer-Specific Transplacental Transfer of Perfluoroalkyl Acids: Results from a Survey of Paired Maternal, Cord Sera, and Placentas. *Environ Sci Technol* 2017; **51**(10): 5756-63.
10. Liu YX, Li A, An Q, et al. Prenatal and postnatal transfer of perfluoroalkyl substances from mothers to their offspring. *Crit Rev Env Sci Tec* 2022; **52**(14): 2510-37.
11. Liu Y, Li A, Buchanan S, Liu W. Exposure characteristics for congeners, isomers, and enantiomers of perfluoroalkyl substances in mothers and infants. *Environ Int* 2020; **144**: 106012.
12. Liu Y, Zhou X, Wu Y, et al. Exposure and Blood–Cerebrospinal Fluid Barrier Permeability of PFASs in Neonates. *Environ Sci Tech Let* 2021; **9**(1): 64-70.
13. Bai X, Ran J, Zhao X, Liang Y, Yang X, Xi Y. The S100A10-AnxA2 complex is associated with the exocytosis of hepatitis B virus in intrauterine infection. *Lab Invest* 2022; **102**(1): 57-68.
14. Zhao P, Wen J, Qian L, Zhu X, Wang H, Bai X. Expression of S100 proteins is associated with HBV intrauterine transmission. *Arch Gynecol Obstet* 2020; **302**(6): 1389-99.
15. Maier L, Goemans CV, Wirbel J, et al. Unravelling the collateral damage of antibiotics on gut bacteria. *Nature* 2021; **599**(7883): 120-4.
16. Ji C, Zhang G, Xu S, et al. Antibiotic treatments to mothers during the perinatal period leaving hidden trouble on infants. *Eur J Pediatr* 2022; **181**(9): 3459-71.
17. Tu X, Chen R, Huang G, et al. Factors Predicting Severe Myelosuppression and Its Influence on Fertility in Patients with Low-Risk Gestational Trophoblastic Neoplasia Receiving Single-Agent Methotrexate Chemotherapy. *Cancer Manag Res* 2020; **12**: 4107-16.
18. Wen J, Bai XX. miR-520h Inhibits cell survival by targeting mTOR in gestational diabetes mellitus. *Acta Biochim Pol* 2021; **68**(1): 65-70.
19. Shen J, Chen Q, Li N, Bai X, Wang F, Li B. TWIST1 expression and clinical significance in type I endometrial cancer and premalignant lesions: A retrospective clinical study. *Medicine* 2020; **99**(48): e23397.
